# Supplementary material for: Partitioning the Heritability of Tourette Syndrome and Obsessive Compulsive Disorder Reveals Differences in Genetic Architecture
Source: PLOS journal article supplement (doi:10.1371/journal.pgen.1003864), 2013-10-24

# Difference From Expected Heritability By Chromosome

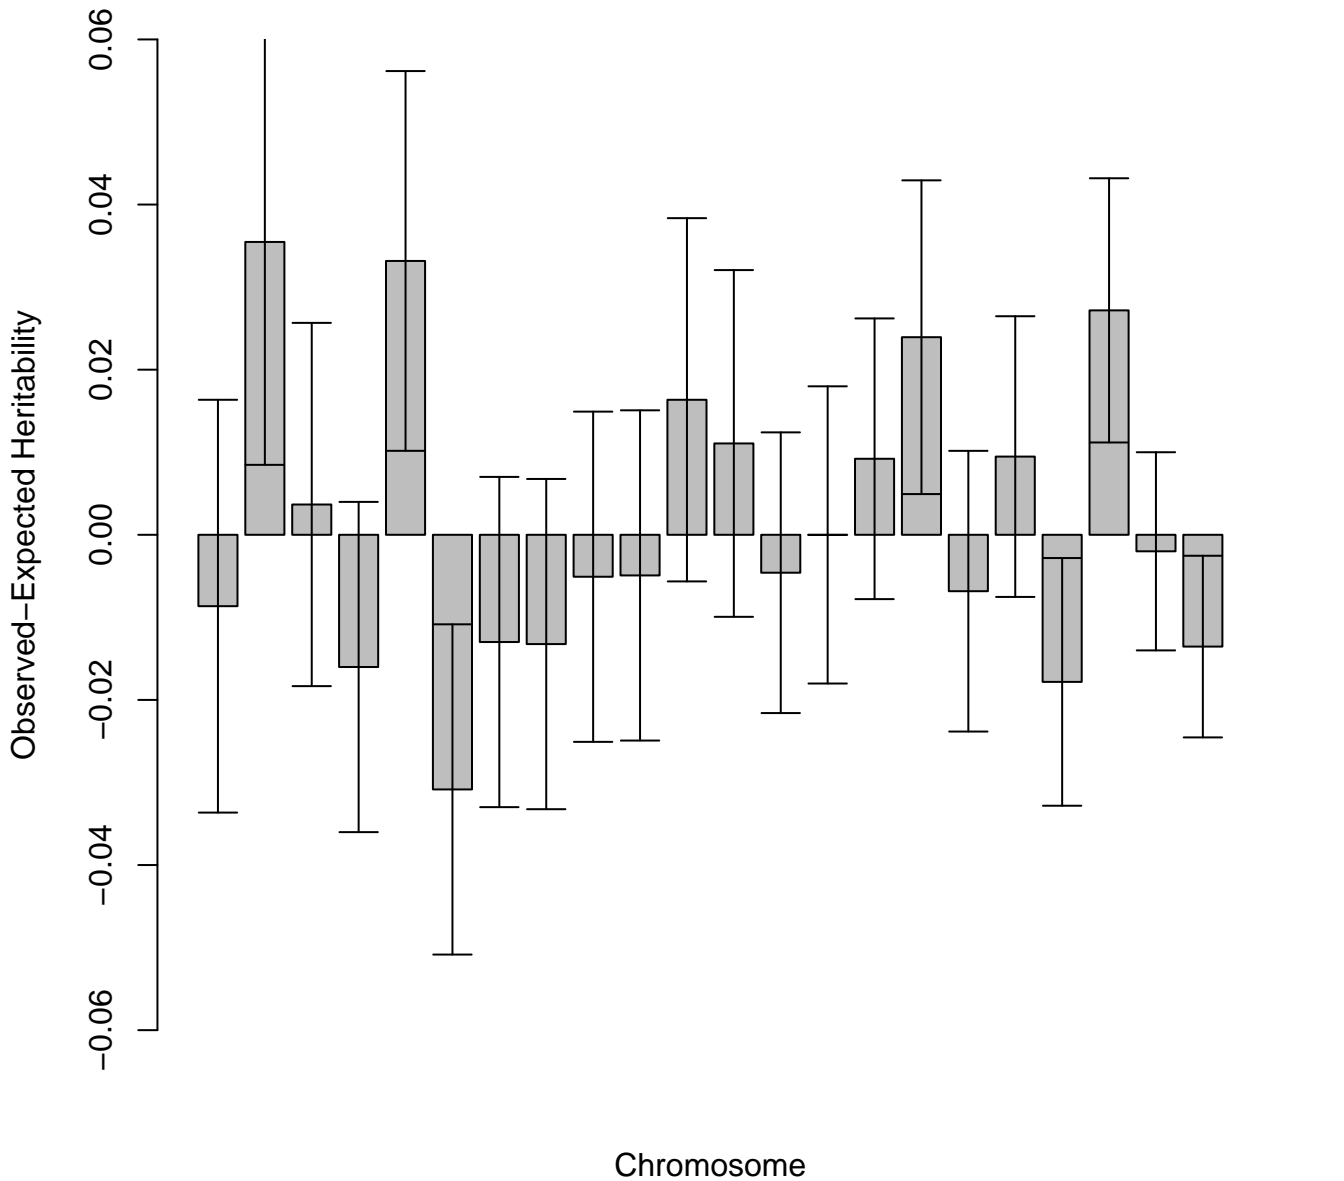

Supplement: S7 (10.1371/journal.pgen.1003864.s007) [file journal.pgen.1003864.s007]
